# Supplementary material for: Gender Related Changes in Gene Expression Induced by Valproic Acid in A Mouse Model of Autism and the Correction by S-adenosyl Methionine. Does It Explain the Gender Differences in Autistic Like Behavior?
Source: MDPI journal article supplement (doi:10.3390/ijms20215278), 2019-10-24

**Supplementary Figure 1: KEGG pathway analysis in females exposed to VPA.** The distribution of differentially expressed genes in prefrontal cortex of females exposed to VPA compared with controls in (A) Huntington’s disease pathway and (B) Alzheimer’s disease pathway. Significantly, deregulated genes are marked with red star, detected using DAVID/KEGG enrichment analysis of the Nanostring array.

A

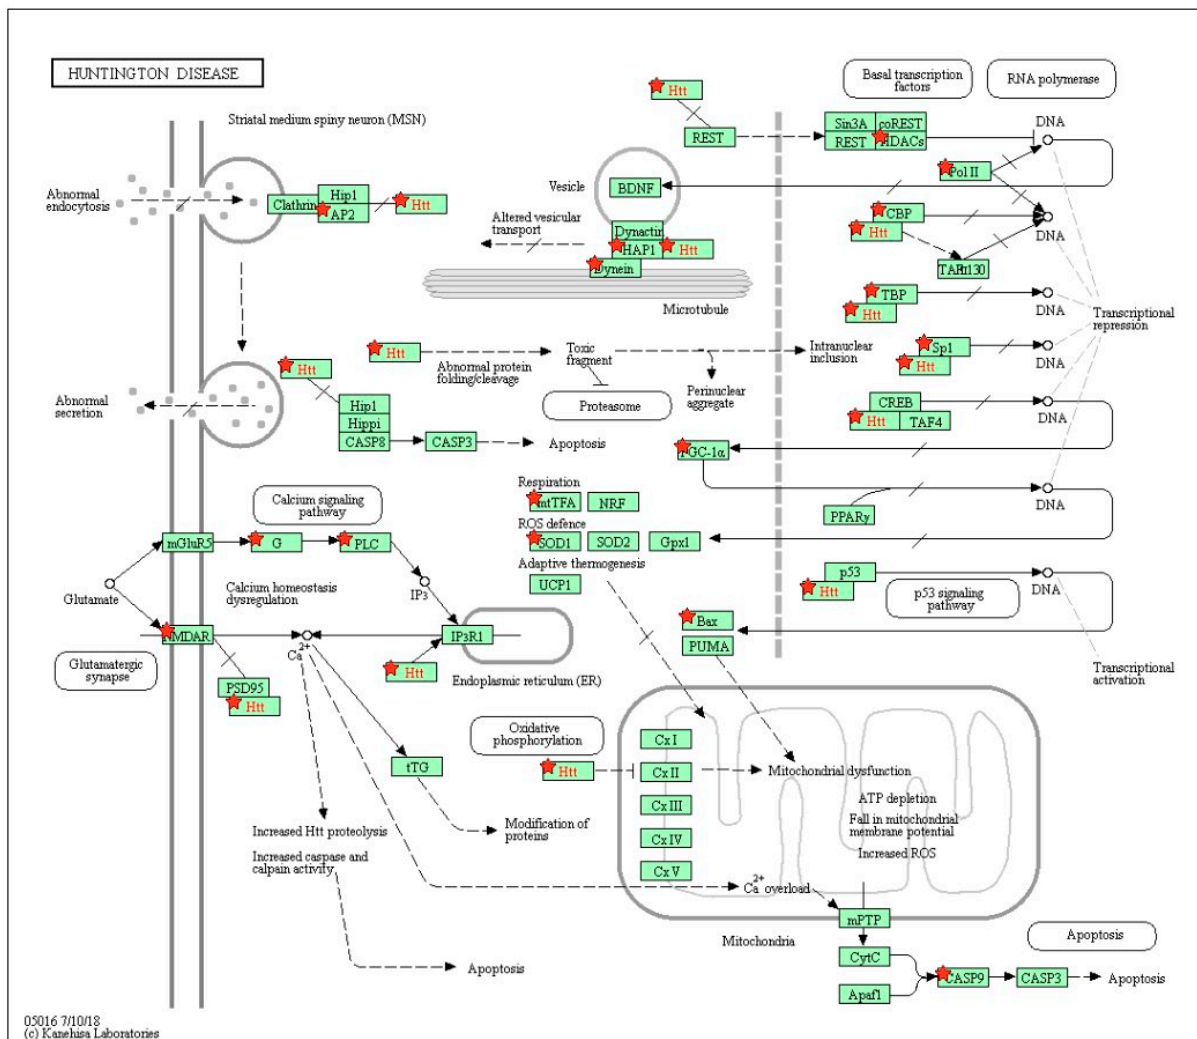

B

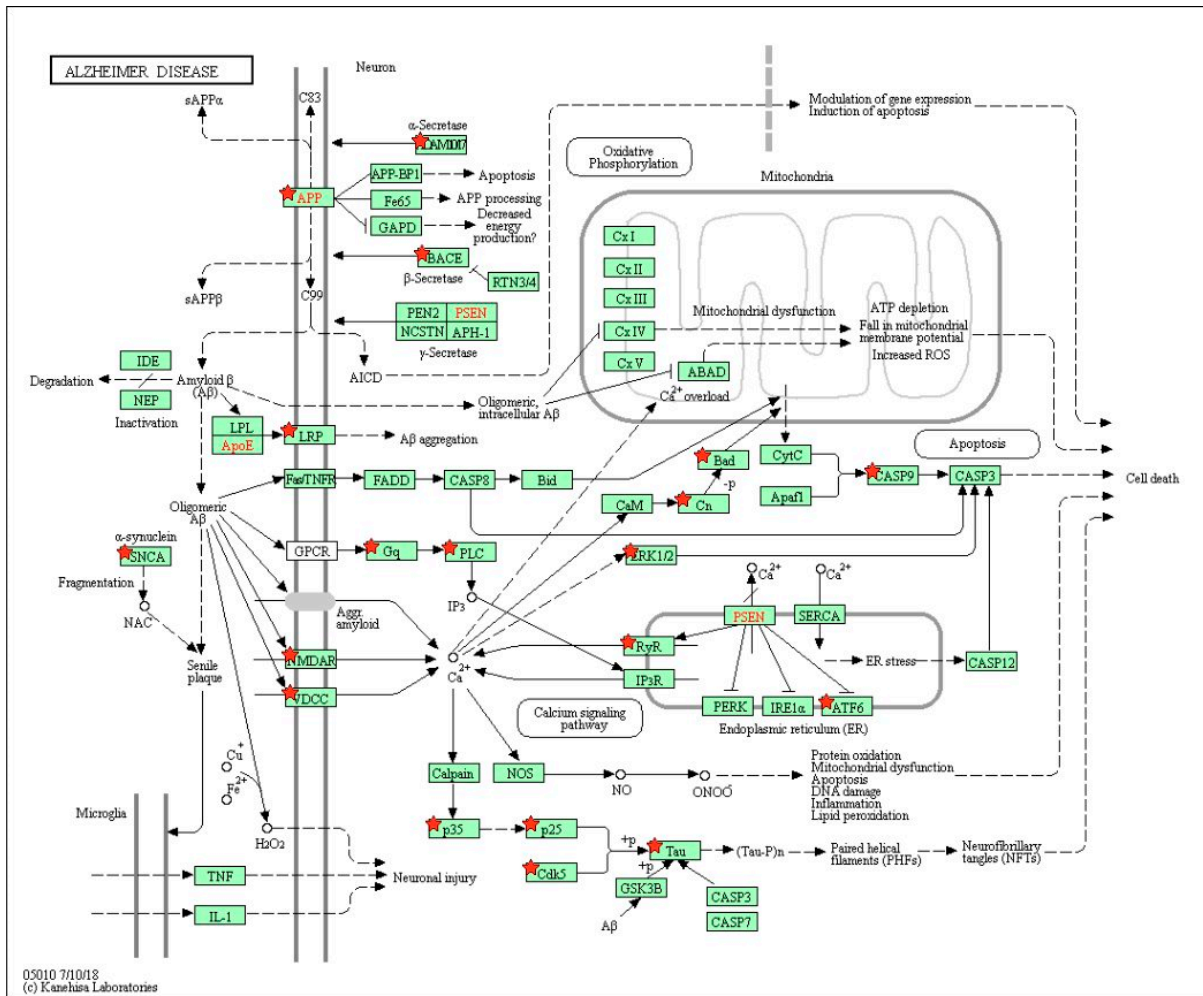

Supplement: s1 [file s1]
